# Supplementary material for: Facile synthesis, characterization and application of highly active palladium nano-network structures supported on electrospun carbon nanofibers
Source: Royal Society of Chemistry journal article supplement (doi:10.1039/c4ra07632j), 2014-01-01
Supplement: c4ra07632j1.pdf [file c4ra07632j1.pdf]

**Supporting Electronic Information (SEI):**

**Facile Synthesis, Characterization and Application of Highly Active Palladium Nano-network Structures Supported on Electrospun Carbon Nanofibers**

Xinwen Peng,<sup>a</sup> Wan Ye,<sup>a</sup> Yichun Ding,<sup>a</sup> Shaohua Jiang,<sup>a\*</sup> Muddasir Hanif,<sup>a</sup>  
Xiaojian Liao<sup>a</sup> and Haoqing Hou<sup>a\*</sup>

Chemistry and Chemical Engineering College, Jiangxi Normal University,  
Nanchang, Jiangxi 330022, P.R. China;

Tel: +86 791 88120740

E-mail: s.jiang19830913@gmail.com (S. Jiang) and haoqing@jxnu.edu.cn (H. Hou)

## Characterization of the Products

### 1. Biphenyl, CAS: 92-52-4

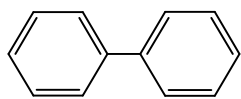

$^1\text{H}$  NMR ( $\text{CDCl}_3$ , 400 MHz, ppm):  $\delta$  7.35 (t, 2H,  $J=7.2$ ), 7.45 (t, 4H,  $J = 7.6$  Hz), 7.59 (d, 4H,  $J = 8.0$  Hz).  $^{13}\text{C}$  { $^1\text{H}$ } NMR ( $\text{CDCl}_3$ , 100 MHz, ppm): 127.19(C), 127.27(C), 128.77 (C), 141.25 (C).

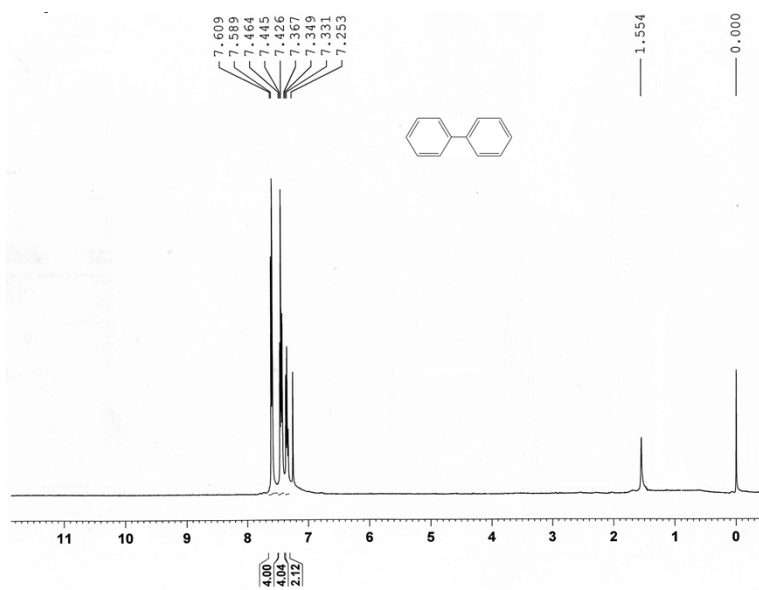

**Figure S1.**  $^1\text{H}$  NMR of Biphenyl in  $\text{CDCl}_3$  solution.

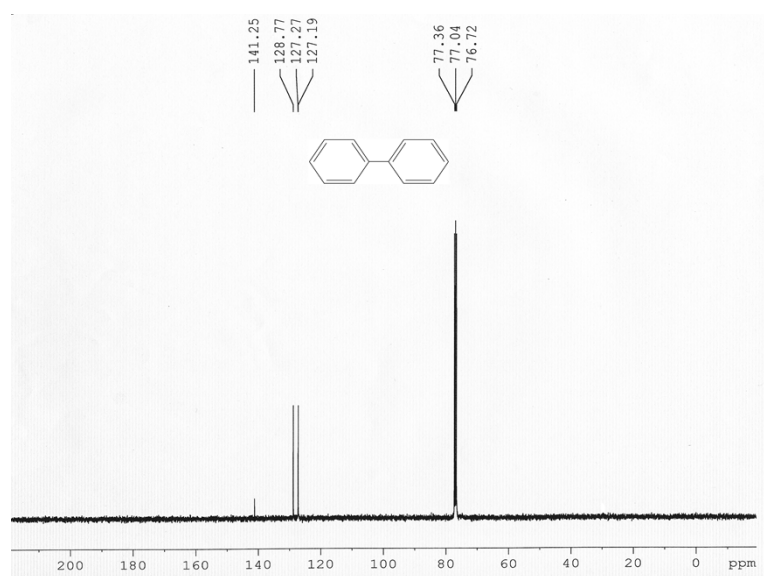

**Figure S2.**  $^{13}\text{C}$  NMR of Biphenyl in  $\text{CDCl}_3$  solution

2. 4-Nitrobiphenyl, CAS: 92-93-3

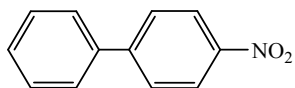

$^1\text{H}$  NMR ( $\text{CDCl}_3$ , 400 MHz, ppm):  $\delta$  7.49(*m*, 3H,  $J=7.2$ ), 7.62(*d*, 2H,  $J=8.0$ ), 7.74(*d*, 2H,  $J=8.0$ ), 8.30(*d*, 2H,  $J=8.0$ ).  $^{13}\text{C}$  { $^1\text{H}$ } NMR ( $\text{CDCl}_3$ , 100 MHz, ppm): 124.41(C), 127.39(C), 127.80 (C), 128.92(C), 138.79 (C), 147.12 (C), 147.64 (C).

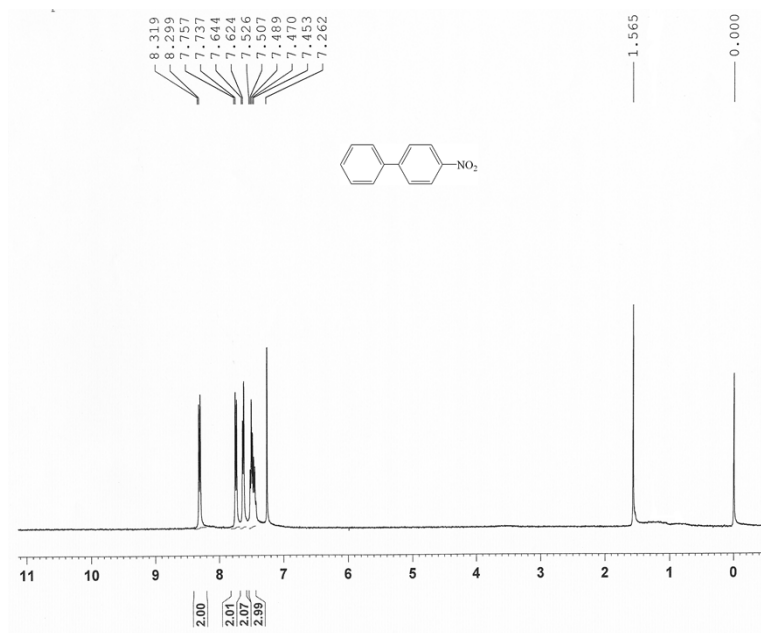

**Figure S3.**  $^1\text{H}$  NMR of 4-Nitrobiphenyl in  $\text{CDCl}_3$  solution.

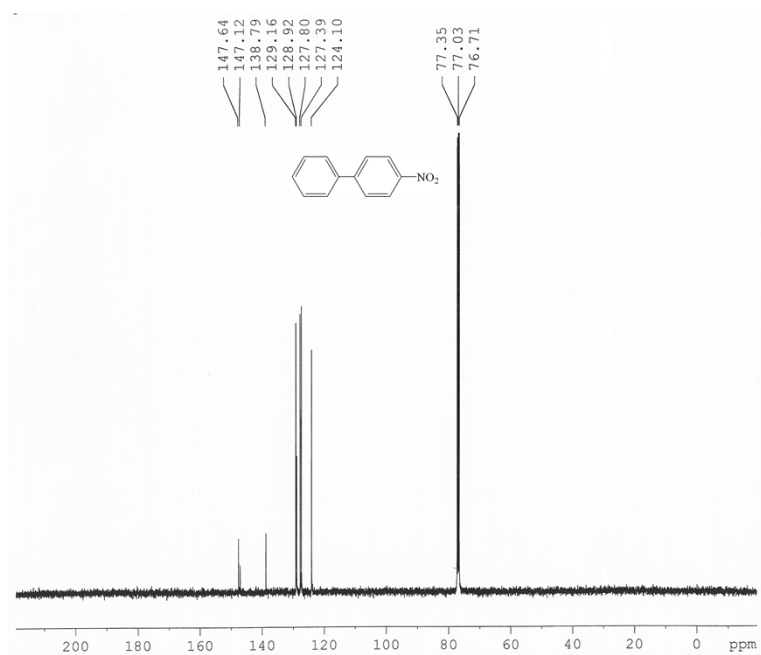

**Figure S4.**  $^{13}\text{C}$  NMR of 4-Nitrobiphenyl in  $\text{CDCl}_3$  solution.

3. 4-Methoxybiphenyl, CAS: 613-37-6

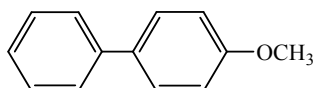

$^1\text{H}$  NMR ( $\text{CDCl}_3$ , 400 MHz, ppm):  $\delta$  3.86 (s, 3H), 6.97(*d*, 2H,  $J=8.4$ ), 7.30(*d*, 1H,  $J=7.6$ ), 7.42(*t*, 2H,  $J=7.6$ ), 7.54(*t*, 4H,  $J=8.4$ ).  $^{13}\text{C}$  { $^1\text{H}$ } NMR ( $\text{CDCl}_3$ , 100 MHz, ppm): 55.37(C), 127.39(C), 114.20 (C), 126.67 (C), 126.75 (C), 128.17 (C), 128.73 (C), 133.78 (C), 140.83 (C), 159.13 (C).

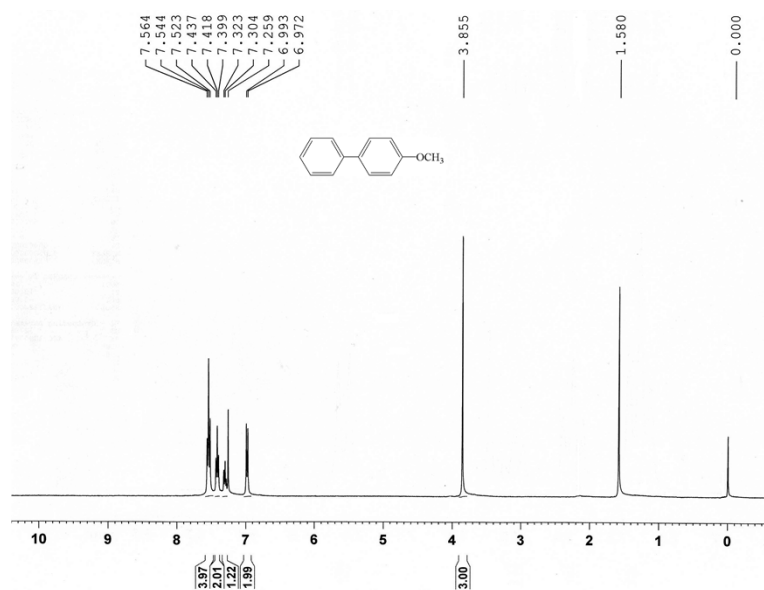

Figure S5.  $^1\text{H}$  NMR of 4-Methoxybiphenyl in  $\text{CDCl}_3$  solution

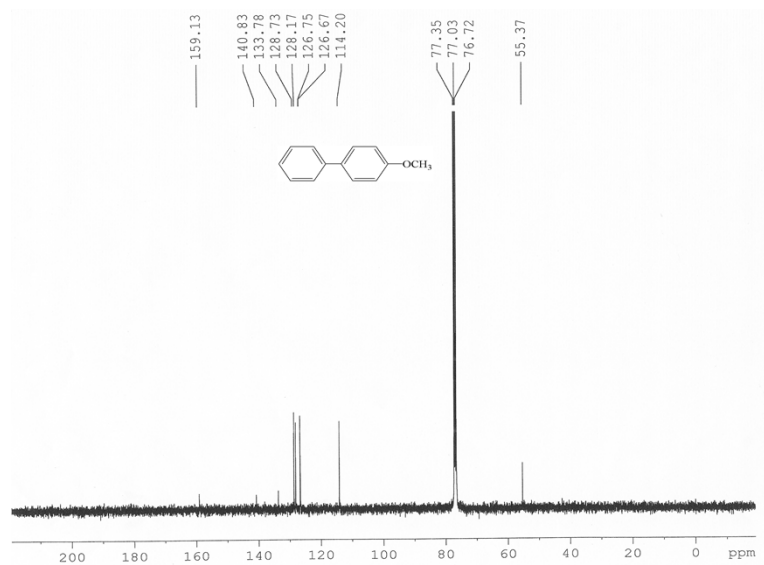

Figure S6.  $^{13}\text{C}$  NMR of 4-Methoxybiphenyl in  $\text{CDCl}_3$  solution
